# Identifiers Suggestive of Clinical Cervical Spine Instability: A Delphi Study of Physical Therapists

**Background and Purpose.** Clinical cervical spine instability (CCSI) is controversial and difficult to diagnose. Within the literature, no clinical or diagnostic tests that yield valid and reliable results have been described to differentially diagnose this condition. The purpose of this study was to attempt to obtain consensus on symptoms and physical examination findings that are associated with CCSI. **Subjects.** One hundred seventy-two physical therapists who were Orthopaedic Certified Specialists (OCS) or Fellows of the American Academy of Orthopaedic Manual Physical Therapists (FAAOMPT) participated in the survey. **Methods.** This study was a 3-round Delphi survey designed to obtain consensual symptoms and physical examination findings for CCSI. **Results.** The symptoms that reached the highest consensus among respondents were “intolerance to prolonged static postures,” “fatigue and inability to hold head up,” “better with external support, including hands or collar,” “frequent need for self-manipulation,” “feeling of instability, shaking, or lack of control,” “frequent episodes of acute attacks,” and “sharp pain, possibly with sudden movements.” The physical examination findings related to cervical instability that reached the highest consensus among respondents included “poor coordination/neuromuscular control, including poor recruitment and dissociation of cervical segments with movement,” “abnormal joint play,” “motion that is not smooth throughout range (of motion), including segmental hinging, pivoting, or fulcruming,” and “aberrant movement.” **Discussion and Conclusion.** The Delphi method is useful in situations where clinical judgments are encountered but empirical evidence to provide evidence-based decision making does not exist. Findings of this study may provide beneficial clinical information, specifically when the identifiers are clustered together, because no set of clinical examination and symptom standards for CCSI currently exists. Diagnosis of CCSI is challenging; therefore, appropriate clinical reasoning is required for distinctive physical therapy assessment using pertinent symptoms and physical examination findings. [Cook C, Brismée JM, Fleming R, Sizer PS Jr. Identifiers suggestive of clinical cervical spine instability: a Delphi study of physical therapists. *Phys Ther.* 2005;85:895–906.]

**Key Words:** *Cervical spine, Clinical instability, Consensus, Delphi method.*

*Chad Cook, Jean-Michel Brismée, Robert Fleming, Phillip S Sizer Jr*

**C**ervical spine pain is a common musculoskeletal condition reportedly affecting 70% of people within their lifetime.<sup>1</sup> Instability is one element of cervical pain and may contribute to the clinical presentation of various conditions, including cervicogenic headaches,<sup>2,3</sup> chronic whiplash dysfunction,<sup>4,5</sup> rheumatoid arthritis,<sup>6</sup> osteoarthritis,<sup>7</sup> and segmental degeneration.<sup>8</sup> Situations involving trauma,<sup>9,10</sup> genetic predisposition,<sup>11</sup> disk degeneration,<sup>12</sup> and surgery<sup>13,14</sup> may compromise the stabilizing mechanisms of the cervical spine.

It has been suggested that different categories of cervical instability exist.<sup>15,16</sup> Radiographically appreciable cervical spine instability (RACSI) may lead to compression of neural or vascular structures,<sup>17</sup> pain,<sup>18</sup> and neurological signs and symptoms.<sup>19</sup> In most cases, RACSI reflects marked disruption of passive osseoligamentous anatomical constraints and hypermobility.<sup>20–23</sup>

Panjabi<sup>13,14</sup> proposed that spinal stability is a component of 3 interactive subsystems: passive, active, and neural. The 3 systems work in concert to provide dynamic stability during the application of external forces. Instability may occur when the active and neural subsystems fail to maintain control within the intervertebral neutral zone of the cervical spine.<sup>15</sup> Unlike RACSI, dysfunction of the active and neural subsystems is more appropriately described as an abnormality of movement rather than hypermobility<sup>22,24</sup> and can present indicators of instability in the absence of passive system (osseoligamentous) pathology. These indicators may include cervical pain,<sup>25</sup> aberrant cervical movements,<sup>26</sup> referred shoulder pain,<sup>26,27</sup> radiculopathy or myelopathy,<sup>28</sup> paraspinal muscle spasms, decreased cervical lordosis,<sup>26</sup> tinnitus,<sup>29</sup> pain during sustained postures,<sup>26</sup> complaints of “catching” or “locking,”<sup>16,25,30,31</sup> and altered range of

motion.<sup>16,25,30,31</sup> In addition, a history of major trauma or repetitive microtrauma may predate report of symptoms.<sup>25</sup>

Within the literature, instability associated with active and neural cervical subsystem failure is identified as clinical cervical spine instability (CCSI), but it also has been characterized as nonradiographic or minor cervical instability.<sup>25,32</sup> Clinical cervical spine instability may demonstrate only subtle symptoms and clinical examination features<sup>25,32</sup> and frequently normal radiographic findings.<sup>33–35</sup> At present, although numerous diagnostic identifiers are suggested for CCSI, a valid and effective criterion standard does not exist. Consequently, the condition is speciously associated with degeneration,<sup>4</sup> kinematic measurements of anterior to posterior shear,<sup>4</sup> abnormal or excessive coupling of the cervical spine,<sup>36</sup> and unquantifiable physical examination findings.<sup>36,37</sup>

The purpose of our study was to obtain consensus of symptoms and physical examination findings associated with CCSI. Using a Delphi method survey, expert practitioners consensually outlined common symptoms and physical examination findings of CCSI. The consensus agreement could be used to enhance the knowledge base required in clinical reasoning during differential diagnosis.

## Method

### Study Design

Our study used a Delphi survey instrument that incorporated both a work group and a respondent group.

### Subjects

**Respondent group.** The population selected for the study consisted of volunteers from 2 “expert” categories.

C Cook, PT, PhD, MBA, OCS, COMT, is Assistant Clinical Professor, Duke University Medical Center 3907, Durham, NC 27710 (USA) (chad.cook@duke.edu). Address all correspondence to Dr Cook.

JM Brismée, PT, ScD, OCS, FAAOMPT, is Assistant Professor, Department of Rehabilitation Sciences, Texas Tech University Health Sciences Center, Lubbock, Tex.

R Fleming, PT, MS, OCS, is Rehabilitation Services Manager, Ellis Hospital, Schenectady, NY.

PS Sizer Jr, PT, PhD, OCS, FAAOMPT, is Associate Professor and Program Director, ScD Program in Physical Therapy, Department of Rehabilitation Sciences, Texas Tech University Health Sciences Center.

Dr Cook, Dr Sizer, and Mr Fleming provided concept/idea/research design. All authors contributed writing, data collection and analysis, and consultation (including review of manuscript before submission). Dr Cook provided project management, subjects, facilities/equipment, and clerical/secretarial support. Dr Cook and Mr Fleming provided fund procurement. Dr Cook and Dr Sizer provided institutional liaisons.

This study was approved by the Texas Tech University Health Sciences Center Institutional Ethics Review Board.

This study was supported by the 2003 Steens/USA Grant.

*This article was received November 4, 2004, and was accepted March 9, 2005.*

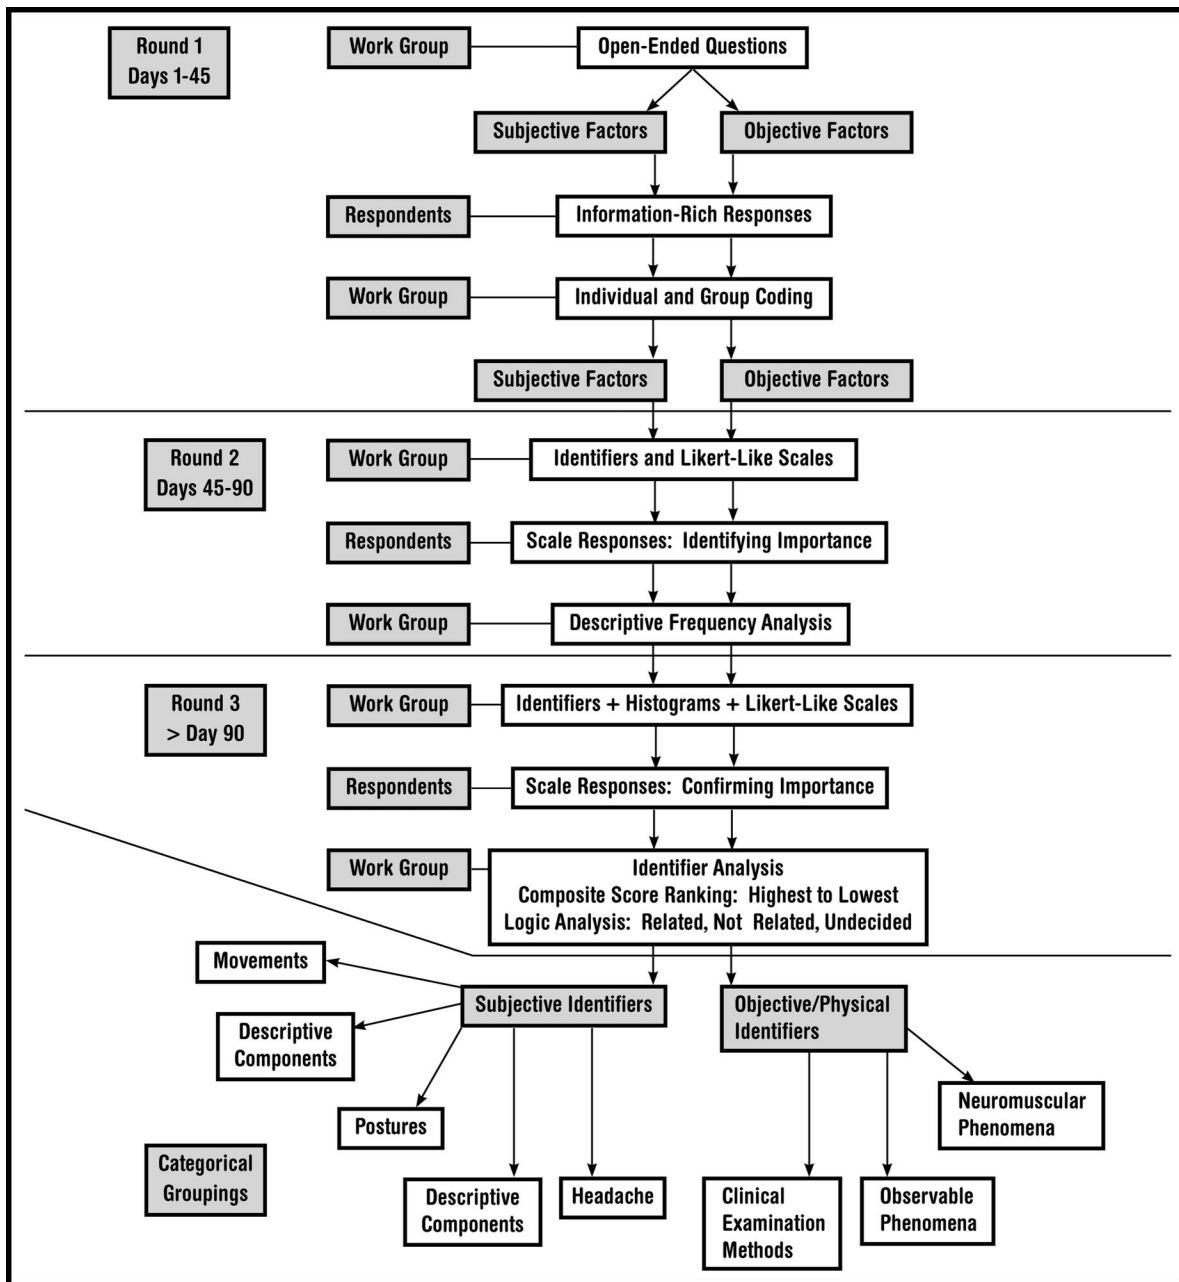

**Figure 1.**  
Flow chart of the Delphi process.

The first group was all board-certified Orthopaedic Certified Specialists (OCS) from the American Physical Therapy Association (APTA) who identified cervical and lumbar dysfunction as their primary practice specialty. The second group targeted was all Fellows of the American Academy of Orthopaedic Manual Physical Therapists (FAAOMPT). This group was targeted because of their clinical expertise obtained through residency or fellowship preparation and because members of the group are acknowledged by the American Academy of Orthopaedic Manual Physical Therapists (AAOMPT) for recognized competence and expertise in the practice of orthopedic manual physical therapy.<sup>38</sup> All targeted par-

ticipants were contacted using traditional direct mail and e-mail (when possible) and then were pooled into a single group upon their agreement to participate.

**Work group.** The work group comprised those investigators who summarized the returned data from round 1 and redesigned the follow-up instruments. This group contained 3 investigators, including the primary investigator (CC) and 2 investigators (JMB and PSS) who were experienced in qualitative research. All principal work group members were board-certified orthopedic physical therapists with a minimum of 14 years and an aggregate of 51 years of research and clinical experience

in orthopedic manual therapy. The primary investigator was a certified manual physical therapist with an emphasis on the Maitland/Australian approach to manual therapy, and the other 2 investigators were certified within the International Academy of Orthopaedic Medicine. All investigators had various levels of training in other orthopedic manual therapy models, including McKenzie, Cyriax, Kaltenborn, Paris, Grimsby, and the osteopathic model. The 2 coinvestigators were Fellows of the AAOMPT.

### Procedure

This Delphi survey consisted of 3 rounds of questionnaires that respondents consecutively answered as illustrated in Figure 1.<sup>39,40</sup> Invitations to round 1 of the study were distributed through e-mail for the OCS group and direct mail for the FAAOMPT group. Each invitation, e-mail, and direct mail provided a Web address link to the Web-based consent form and survey. Potential respondents who did not answer the request for participation were sent a reminder notice to encourage participation using a method suggested by Dillman.<sup>41</sup> Two consecutive follow-up reminders were delivered at 10 and 20 days after the initial invitation was sent.<sup>42-44</sup> Invitations to rounds 2 and 3 of the instrument were automatically distributed through e-mail to all respondents from round 1, providing the respondents with a Web link to the appropriate survey.

### Instrument

The instrument used in round 1 of the survey included questions regarding basic demographic information and open-ended questions related to symptoms and physical examination findings for patients with CCSI. After defining CCSI, the first open-ended question in round 1 queried respondents to distinguish the symptoms they deemed to be associated with CCSI. The second open-ended question queried respondents to distinguish physical examination findings they believed to be associated with CCSI. The responses to the open-ended questions provided the multiple identifiers used for rounds 2 and 3. The symptoms and physical examination findings used throughout the 3 rounds were selected solely by the Delphi survey participants and were not generated by the work group.

The invitation to round 1 included specific directions and an operational definition of CCSI: "painful hypermobility, inappropriate dynamic control, and/or non-radiographic instability." For the sake of classification, we directed the respondents to consider *symptoms* as "activities that result in pain and the nature of that pain: Examples include the immediate onset of headaches during extension or pain that occurs through range of motion." *Physical examination findings* were defined as "activities, motions, and movement patterns that are uniquely identifiable for cervical spine instability: Exam-

ples include reduced willingness to volitionally move the head, or forward head posture."

The instrument used in round 2 of the survey was a list of the symptoms and physical examination findings constructed from the work group's qualitative analysis of the responses from round 1. The purposes of round 2 were to allow respondents to (1) review the categories of responses from round 1 for clarification and correction of terminology and (2) identify the most important identifiers related to the diagnosis of clinical instability of the cervical spine. Respondents were instructed to use a 5-point Likert scale to score each of these identifiers in terms of their level of agreement that the identifier was related to CCSI. Demographics were not collected during round 2, because much of the information was redundant to that from round 1.

The instrument used in round 3 of the survey contained the same identifier list and rating scale used in round 2, with additional tables and graphs demonstrating the descriptive statistical score outcomes for each identifier statement. Figure 2 depicts an example of a graphic representation similar to those used during round 3. The graphic information identified the percentage of total respondents who selected each possible score for the given item in round 2. The respondents were instructed to re-score each identifier with the scale after viewing the scoring results from round 2. Consequently, round 3's list of CCSI identifiers included a re-score of the same identifiers from round 2, only after each respondent reviewed the round 2 scores of the other respondents.

### Data Analysis

After respondents completed each round, the WebSurveyor program\* automatically downloaded response data onto a spreadsheet for work group analyses. The tally of scores for "strongly disagree" and "disagree" represented the total percentage of scores in the "Not Related" category, meaning that the symptoms or physical examination findings were not important for the diagnosis of cervical spine instability. Conversely, the tally of scores for "strongly agree" and "agree" were placed in the "Related" category, meaning that the particular identifiers for symptoms or physical examination findings were important for that diagnosis. Consensus was established if 75% or more of the respondents<sup>39</sup> scored the symptoms or physical examination findings as "Consensus, Not Related" or "Consensus, Related." Figure 2 provides an example of a consensus-scoring tally.

If the tally for "Not Related" or "Related" was between 50% and 74.9%, consensus was not established and a decision was forced among "Near-Consensus, Not-

\* WebSurveyor Corp, 505 Huntmar Park Dr, Ste 225, Herndon, VA 20170.

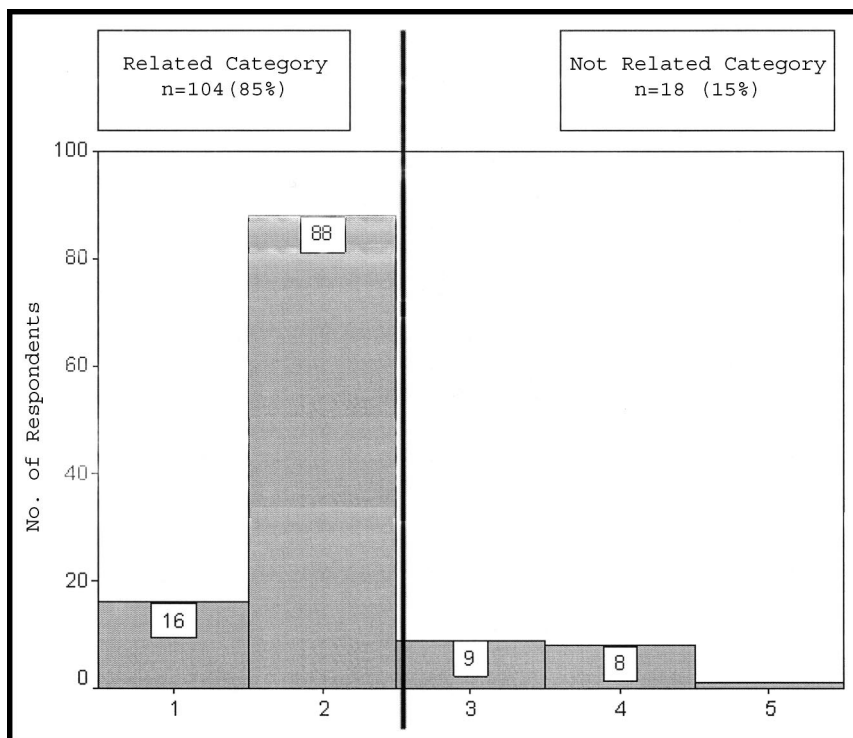

**Figure 2.**

Example of a consensus-scoring tally indicating consensus or no consensus. Identifier displayed is “catching, clicking, clunking, and popping sensation.” 1=strongly agree, 2=agree, 3=not applicable, 4=disagree, and 5=strongly disagree.

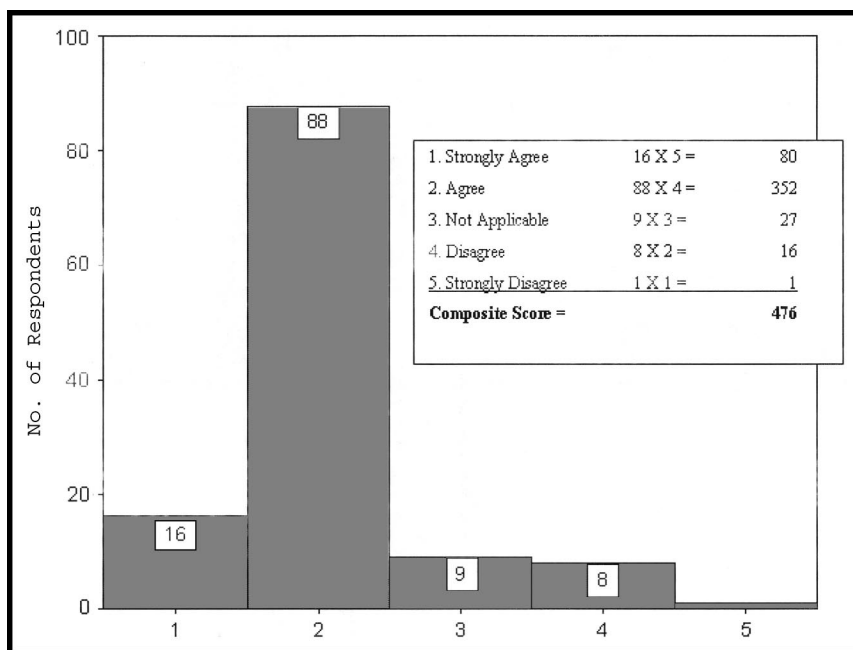

**Figure 3.**

Composite score tally sheet. The text bar represents the calculations associated with composite score ranking. The total composite score then is compared with the scores of other identifiers.

Related,” “Near-Consensus, Related,” and “Undecided.”<sup>45</sup> A logic analysis was conducted in order to derive a decision among “Near-Consensus, Related,” “Near-Consensus, Not Related,” and “Undecided.”<sup>45</sup> If the tally for “strongly agree” and “agree” was greater than the tally for “strongly disagree” and “disagree,” the identifier was labeled as “Near-Consensus, Related.” Similarly, if the tally for “strongly disagree” and “disagree” was greater than the tally for “agree” and “strongly agree,” the identifier was labeled as “Near-Consensus, Not Related.” However, if the tally for “agree” and “disagree” was greater than the tally for “strongly agree” and “agree” or the tally for “strongly disagree” and “disagree,” the identifier was labeled as “Undecided.”

After consensus was established, the identifiers for symptoms and physical examination findings were ranked by composite score using the following formula:

$$\text{Composite Score} = (n1 \times 5) + (n2 \times 4) + (n3 \times 3) + (n4 \times 2) + (n5 \times 1)$$

The identifiers for symptoms or physical examination findings were tallied as:

$n1$ =number of respondents who scored the identifier as “strongly agree”

$n2$ =number of respondents who scored the identifier as “agree”

$n3$ =number of respondents who scored the identifier as “undecided”

$n4$ =number of respondents who scored the identifier as “disagree”

$n5$ =number of respondents who scored the identifier as “strongly disagree”

For clarification purposes, a graphic example of this composite score tally is presented in Figure 3. The composite score value for each identifier was derived from the tally of scores. For example, the identifier in Figure 3 was

**Table 1.**  
Respondent Characteristics<sup>a</sup>

|                     |                                                                                                                                                                        |
|---------------------|------------------------------------------------------------------------------------------------------------------------------------------------------------------------|
| Age                 | $\bar{X}$ =42.3 y<br>Range=27–61 y<br>Missing values=3                                                                                                                 |
| Sex                 | Male=96<br>Female=72<br>Missing values=4                                                                                                                               |
| Credentials         | FAAOMPT=66<br>OCS=78<br>Both=49<br>Missing values=28                                                                                                                   |
| Experience          | $\bar{X}$ =17.5 y<br>Range=3–39 y<br>Missing values=3                                                                                                                  |
| Work setting        | >50% of clinical time in non-hospital-based outpatient setting=107<br>>50% of clinical time in hospital-based outpatient setting=38<br>Missing values=27               |
| Reported background | Grimsby 4.12%<br>Kaltenborn 8.24%<br>Maitland 24.12%<br>McKenzie 14.71%<br>NA 0%<br>NAIOMPT 7.65%<br>Osteopathic 19.41%<br>Other 8.24%<br>Paris 12.35%<br>Winkel 1.18% |

<sup>a</sup>FAAOMPT=Fellow of the American Academy of Orthopaedic Manual Physical Therapists, OCS=Orthopaedic Certified Specialist, NAIOMPT=North American Institute of Orthopaedic Manual Therapy, NA=not applicable.

assigned a composite score of 476. This composite score then was compared with the composite scores of the other symptoms or physical examination findings to establish rank or priority for each heading. The highest score represented the identifier that the respondent group outlined as most explicit for CCSI.

The respondents assigned scores both without (round 2) and with (round 3) graphic feedback from the other respondents; therefore, it was expected that changes might occur between rounds. We used Megastat, version 9.0,<sup>†</sup> and a Mann-Whitney *U* test ( $\alpha=.05$ ) to compare ranked scores between rounds 2 and 3 for both symptoms and physical examination findings.

## Results

### Round 1

We solicited 1,111 Orthopedic Certified Specialists from APTA and 334 Fellows of the AAOMPT (1,445 total) for participation in the study. Microsoft Outlook Express,

version 6.1,<sup>‡</sup> identified 92 potential respondents who were inaccessible because of incorrect e-mail address, server difficulties, or relocation without a new address. One hundred seventy-two clinicians (11.9%; mean age=42.3 years, range=27–61 years) responded to round 1. These respondents reported 3 to 39 years of physical therapist practice ( $\bar{X}$ =17.5 years). Ninety-six respondents were male and 72 were female; 4 respondents failed to answer this question. One hundred seven respondents (64%) indicated that 50% or more of their clinical practice time was spent in a non-hospital-based outpatient clinical practice. Table 1 outlines pertinent respondent data.

### Rounds 2 and 3

Twenty-eight subjects did not leave e-mail contact information during round 1; therefore, only 140 of the 172 respondents were contacted for participation in round 2. One hundred thirty-three respondents (81.4% retention rate between rounds 1 and 2; 9.7% overall response rate) completed round 2, and 122 respondents (70.9%) completed round 3, producing a 92% retention rate between rounds 2 and 3 and an overall response rate of 8.4%. The total composite score tallies for rounds 2 and 3 are reported in Table 2 for symptom identifiers and Table 3 for physical examination finding identifiers.

Sixteen symptom identifiers were ranked as “Consensus, Related” with CCSI and 1 was ranked as “Near-Consensus, Related” in round 3. In addition, 1 symptom identifier was ranked as “Consensus, Not Related” and 11 were ranked as “Undecided.” Twelve physical examination finding identifiers were ranked as “Consensus, Related” with CCSI whereas 2 were ranked as “Near-Consensus, Related,” 1 was ranked as “Consensus, Not Related,” and 13 were ranked as “Undecided.”

Each identifier’s ranked outcomes are reported by composite rank in Tables 2 and 3. “Intolerance to prolonged static postures” was the symptom identifier that was most related to CCSI. “Fatigue and inability to hold head up” ranked second, followed by “better with external support, including hands or collar.” “Spinal cord symptoms with neck movement,” “temporomandibular (TMJ) symptoms,” and “cervical instability does not exist” ranked as the 3 symptom identifiers that were least related to CCSI.

Overall, “poor coordination/neuromuscular control, including poor recruitment and disassociation of cervical segments with movement” ranked as the physical examination finding that was most related to CCSI, followed by “abnormal joint play.” The third most related physical examination finding was “motion that is

<sup>†</sup>JB Orris, Butler University, College of Business Administration, 4600 Sunset Ave, Indianapolis, IN 46208.

<sup>‡</sup>Microsoft Corp, One Microsoft Way, Redmond, WA 98052.

**Table 2.**

Symptoms of Consensus and Rank Outcomes for Clinical Cervical Spine Instability (CCSI), Listed in Descending Rank

| Identifier                                                                                            | Round 3<br>Consensus<br>Status <sup>a</sup> | Round 2<br>Composite<br>Score | Round 3<br>Composite<br>Score |
|-------------------------------------------------------------------------------------------------------|---------------------------------------------|-------------------------------|-------------------------------|
| Intolerance to prolonged static postures                                                              | CR                                          | 481                           | 502                           |
| Fatigue and inability to hold head up                                                                 | CR                                          | 464                           | 499                           |
| Better with external support, including hands or collar                                               | CR                                          | 487                           | 493                           |
| Frequent need for self-manipulation                                                                   | CR                                          | 466                           | 488                           |
| Feeling of instability, shaking, or lack of control                                                   | CR                                          | 464                           | 485                           |
| Frequent episodes of acute attacks                                                                    | CR                                          | 466                           | 483                           |
| Sharp pain, possibly with sudden movements                                                            | CR                                          | 470                           | 481                           |
| Head feels heavy                                                                                      | CR                                          | 473                           | 480                           |
| Neck gets stuck, or locks, with movement                                                              | CR                                          | 462                           | 479                           |
| Better in unloaded position such as lying down                                                        | CR                                          | 449                           | 476                           |
| Catching, clicking, clunking, and popping sensation                                                   | CR                                          | 462                           | 476                           |
| Past history of neck dysfunction or trauma                                                            | CR                                          | 480                           | 476                           |
| Trivial movements provoke symptoms                                                                    | CR                                          | 456                           | 469                           |
| Muscles feel tight or stiff                                                                           | CR                                          | 464                           | 467                           |
| Unwillingness, apprehension, or fear of movement                                                      | CR                                          | 435                           | 462                           |
| Temporary improvement with clinical manipulation                                                      | CR                                          | 442                           | 464                           |
| Increased pain as day progresses                                                                      | NCR                                         | 445                           | 453                           |
| Complaints of dull ache                                                                               | U                                           | 438                           | 443                           |
| Reports of sleep disturbances                                                                         | U                                           | 438                           | 439                           |
| Inconsistency of symptoms, including pain that shifts from side to side                               | U                                           | 425                           | 435                           |
| Feeling that head is disconnected from neck                                                           | U                                           | 416                           | 433                           |
| Complaints of headache                                                                                | U                                           | 436                           | 430                           |
| History of disorder or syndrome, such as Ehlers-Danlos syndrome,<br>Marfan syndrome, or Down syndrome | U                                           | 401                           | 395                           |
| Pain with the initiation of motion                                                                    | U                                           | 363                           | 385                           |
| Pain through the range of motion                                                                      | U                                           | 372                           | 355                           |
| Vertebrobasilar insufficiency symptoms that include dizziness, diplopia,<br>drop attacks, and nausea  | U                                           | 371                           | 352                           |
| Spinal cord symptoms with neck movement                                                               | U                                           | 361                           | 325                           |
| Temporomandibular joint symptoms                                                                      | U                                           | 343                           | 323                           |
| Cervical instability does not exist                                                                   | CNR                                         | 190                           | 157                           |

<sup>a</sup> CR=Consensus, Related; NCR=Near-Consensus, Related; CNR=Consensus, Not Related; U=Undecided.

not smooth throughout range (of motion), including segmental hinging, pivoting, or fulcruming.” In addition, the 3 physical examination findings that were determined to be least related to CCSI included “pain at end range of movement,” “positive VBI (vertebrobasilar insufficiency) tests,” and “segmental instability does not exist.” Finally, no differences in composite score rankings were detected through data analysis for rounds 2 and 3 in the symptom identifiers ( $P=.19$ ) or physical examination finding identifiers ( $P=.41$ ).

## Discussion

The Delphi method is useful in situations where frequent clinical or practical judgments are encountered but where empirical evidence to provide evidence-based decision making does not exist.<sup>45–47</sup> Past studies have used the Delphi method to create standards in quality assessment, components of diagnosis, and refinement of treatment.<sup>48–52</sup> At present, clinical detection of CCSI using pathoanatomical, radiological, and selected clinical assessment methods has inherent limitations.<sup>22,53,54</sup> Subsequently, the use of a Delphi method may provide

beneficial clinical information because no set of clinical examination and symptom standards for CCSI currently exists.

The success of a Delphi study rests explicitly on the expertise of the participants who make up the respondent group. Two group characteristics may influence the success of the Delphi method: panel size and qualifications. Some authors<sup>47,55,56</sup> have suggested that appropriate panel sizes range from 10 to more than 1,000. Murphy et al<sup>57</sup> argued that the more expert participants, the better, although little empirical evidence exists on whether more participants affect the reliability or validity of data for a consensus process.<sup>57,58</sup> The Delphi method does not require expert panels to be representative samples for statistical purposes, nor is a specific volume required for appropriate sampling validity.<sup>47</sup> Nonetheless, to lend credibility to the findings, it is essential that the panel consist of heterogeneous members who work in the appropriate targeted area.<sup>47</sup> It is our assumption that the OCS and FAAOMPT have the expertise to identify CCSI.

**Table 3.**

Physical Examination Findings of Consensus and Rank Outcomes for Clinical Cervical Spine Instability (CCSI), Listed in Descending Rank

| Identifier <sup>a</sup>                                                                                                 | Round 3 Consensus Status <sup>b</sup> | Round 2 Composite Score | Round 3 Composite Score |
|-------------------------------------------------------------------------------------------------------------------------|---------------------------------------|-------------------------|-------------------------|
| Poor coordination/neuromuscular control, including poor recruitment and dissociation of cervical segments with movement | CR                                    | 481                     | 508                     |
| Abnormal joint play                                                                                                     | CR                                    | 492                     | 508                     |
| Motion that is not smooth throughout range (of motion), including segmental hinging, pivoting, or fulcruming            | CR                                    | 491                     | 499                     |
| Aberrant movement                                                                                                       | CR                                    | 459                     | 486                     |
| Hypomobility of upper thoracic spine                                                                                    | CR                                    | 467                     | 478                     |
| Increased muscle guarding, tone, or spasms with test movements                                                          | CR                                    | 474                     | 477                     |
| Palpable instability during test movements                                                                              | CR                                    | 469                     | 475                     |
| Jerkiness or juddering of motion during cervical movement                                                               | CR                                    | 450                     | 472                     |
| Decreased cervical muscle strength                                                                                      | CR                                    | 428                     | 468                     |
| Catching, clicking, clunking, popping sensation heard during movement assessment                                        | CR                                    | 454                     | 467                     |
| Fear, apprehension, or decreased willingness to move during examination                                                 | CR                                    | 457                     | 465                     |
| Pain provocation with joint-play testing                                                                                | CR                                    | 451                     | 456                     |
| Motion disparity between AROM and PROM                                                                                  | NCR                                   | 434                     | 455                     |
| Poor posture; postural deviations                                                                                       | U                                     | 443                     | 448                     |
| Decreased AROM in weight bearing                                                                                        | NCR                                   | 419                     | 446                     |
| Need to support head during examination movements                                                                       | U                                     | 425                     | 441                     |
| Positive radiographic evidence                                                                                          | U                                     | 425                     | 439                     |
| Palpable segmental changes, such as step-off at C5-C6                                                                   | U                                     | 426                     | 429                     |
| Positive ligament shear test                                                                                            | U                                     | 423                     | 424                     |
| Painful arc, including through range of pain                                                                            | U                                     | 423                     | 422                     |
| Forward head posture                                                                                                    | U                                     | 369                     | 412                     |
| Positive test for transverse ligament of atlas                                                                          | U                                     | 414                     | 396                     |
| Hypomobility of upper cervical spine                                                                                    | U                                     | 387                     | 391                     |
| Positive Alar Ligament Stress Test                                                                                      | U                                     | 406                     | 389                     |
| Positive Sharp-Purser Test                                                                                              | U                                     | 412                     | 352                     |
| Pain at end range of movement                                                                                           | U                                     | 395                     | 374                     |
| Positive VBI tests                                                                                                      | U                                     | 348                     | 321                     |
| Segmental instability does not exist                                                                                    | CNR                                   | 249                     | 152                     |

<sup>a</sup> AROM=active range of motion, PROM=passive range of motion, VBI=vertebrobasilar insufficiency.<sup>b</sup> CR=Consensus, Related; NCR=Near-Consensus, Related; CNR=Consensus, Not Related; U=Undecided.

In this study, the panel members selected were Fellows of the AAOMPT and board-certified Orthopedic Clinical Specialists of APTA. Fellows of the AAOMPT were targeted as experts based on their previous residency or fellowship training, which is designed to advance the physical therapist fellow's preparation as a provider of patient care services in a defined area of clinical practice. In addition, APTA proposes that the designation of orthopedic specialist certification depicts a clinician with "knowledge, skill, and experience exceeding that of the physical therapist at entry to the profession and unique to the specialized area of practice."<sup>59</sup>

#### Proposed Identifiers for Symptoms

The Delphi survey participants consensually selected symptoms that were qualitatively grouped by the work group members into 5 conceptually similar areas: (1) movements, (2) descriptive components, (3) postures, (4) neurological phenomena, and (5) headaches. Movement-related identifiers included "sharp pain, possibly with sudden movements," "neck gets stuck, or locks, with movement," and "trivial movements provoke symp-

toms." In addition, "unwillingness, apprehension, or fear of movement" was identified, a finding supported by Klein et al,<sup>31</sup> who reported an unwillingness of patients with whiplash-associated disorders to move their neck beyond comfort zones into ranges where higher muscle activity is engaged.

Descriptive components included identifiers that describe the type of pain or an action that modulates the pain. Within this category, the Delphi survey participants selected "past history of neck dysfunction or trauma," "better with external support, including hands or collar," "frequent need for self-manipulation," "feeling of instability, shaking, or lack of control," "frequent episodes of acute attacks," "head feels heavy," "catching, clicking, clunking, and popping sensation," "muscles feel tight or stiff," "temporary improvement with clinical manipulation," and "increased pain as day progresses." Several authors<sup>11,60,61</sup> have identified the coexistence of trauma and cervical spine instability. Other authors<sup>62</sup> have related cervical spine instability with comorbidities, such as spondylosis or spine degeneration, although these



relationships appear less definitive. These studies did not determine whether the instability condition was radiographically appreciable.

Postural identifiers included “intolerance to prolonged static postures” and “better in unloaded position such as lying down”—2 findings supported by other authors.<sup>26,63</sup> Lying down may reduce intolerance to segmental physiological loading, as reported by Oxland and Panjabi<sup>10</sup> Mid-postural position of the cervical spine displayed the highest area of load sensitivity. Hypothetically, mid-position is the posture that requires the most dynamic control of the neutral zone and is the position most prone to instability problems.<sup>11</sup> Subjects with long-term rheumatologic-related instability show changes in muscle fibers, which can lead to losses of postural stability and decreased control of the neutral zone.<sup>63</sup>

The Delphi survey respondents were undecided about “spinal cord symptoms with neck movement” or “complaints of headache” as specific identifiers of CCSI in our study. Past studies<sup>11,62,64</sup> have suggested that cervical myelopathy and radiculopathy are associated with cervical spine instability. Most authors who have evaluated cord-related and radicular symptoms related to cervical spine instability have done so following severe trauma or dislocation of the cervical spine. Still, some symptomatic complaints may be related to repeated episodes of severe neck pain with minor provocation<sup>65–67</sup> and may be less obviously deduced. Moreover, several authors have suggested the relationship between headaches and instability, most notably secondary to instability within the upper cervical spine<sup>3,27,68</sup> as well as the C5–6 intervertebral disk.<sup>69</sup>

#### *Proposed Identifiers for Physical Examination Findings*

The composite scores for neuromuscular-related phenomena were scored high as identifiers of CCSI. “Poor coordination/neuromuscular control, including poor recruitment and dissociation of cervical segments with movement” was ranked first, “increased muscle guarding, tone, or spasms with test movements” was ranked sixth, and “decreased cervical muscle strength” was ranked ninth. Jull and colleagues<sup>27,68</sup> found dysfunction of the deep neck flexors (longus colli and longus capitis muscles) in people with cervicogenic headache and whiplash, accompanied by their inability to generate tension and sustain this tension under a low load. They hypothesized that the coexistence of poor coordination and strength of the deep neck flexors and cervical spine instability may be a contributor to cervicogenic symptoms such as headaches. Other researchers<sup>26,70,71</sup> have observed overactivity of the upper trapezius muscle in people with long-term, chronic instability-related conditions such as whiplash, further suggesting a distortion of motor control strategies.

Phenomena that involve observation during the physical examination dominated the identifiers selected by the Delphi survey participants. The participants selected “motion that is not smooth throughout range (of motion), including segmental hinging, pivoting, or full-crumbing,” “aberrant movement,” “jerkiness or juddering of motion during cervical movement,” “catching, clicking, clunking, popping sensation heard during movement assessment,” “fear, apprehension, or decreased willingness to move during examination,” “motion disparity between AROM (active range of motion) and PROM (passive range of motion),” and “decreased AROM in weight bearing” as consensual or near-consensual identifiers. Other authors have associated catching or locking<sup>32</sup> and abnormalities in range of motion of the cervical spine<sup>15</sup> with CCSI.

Clinical examination methods to determine the integrity of ligaments or the active stabilization capabilities of the cervical spine often offer little conclusive evidence and are fraught with poor reliability.<sup>39,60,72</sup> Despite this, numerous clinical tests for cervical spine instability exist. Most methods examine the integrity of the alar and transverse ligaments, with varied reported levels of reliability.<sup>73</sup> Nearly all manual instability assessment methods are finite, require very skilled assessment, and have not been corroborated by simultaneous diagnostic measurement.<sup>5</sup> Notable exclusions from the Delphi list of consensus identifiers were the special tests associated with CCSI. The Delphi survey participants did not reach consensus for a “positive ligament shear test,” a “positive test for transverse ligament of atlas,” a “positive Alar Ligament Stress Test,” “positive (vertebrobasilar insufficiency) VBI tests,” and a “positive Sharp-Purser Test.” Although the Sharp-Purser test has been found to be a valid indicator<sup>73,74</sup> for detection of radiographic instability, this method was not consensually chosen as an identifier for CCSI.

Historically, hypermobility, or “greater range of motion,” has been erroneously confused with spine instability.<sup>54,75</sup> However, the Delphi survey participants aligned well with literature-based findings and did not recognize hypermobility or greater range of motion as forms of CCSI. The group did identify “abnormal joint play” and “palpable instability during test movements,” suggesting the assumption that abnormal segmental movements are clinically discernible from normal movements.<sup>76</sup> Past studies<sup>72,77</sup> have suggested that most passive joint assessment or palpatory tests traditionally have poor interrater reliability. Further investigation is necessary to determine whether physical therapists are able to make such diminutive joint assessment or palpatory judgments.

### *Clinical Application*

Jensen et al<sup>78</sup> reported that expert clinicians were comfortable with ambiguity and had the capacity to self-monitor their data collection and thinking patterns. They are able to do this by combining clusters of information together into workable sets, based on past experience and cooperative decision making. A growing body of expertise literature suggests that orthopedic clinical experts have the capacity to recognize inconsistencies or links between data variables collected and have the capability to distill appropriate information for diagnostic and treatment purposes.<sup>79</sup> Clinical cervical spine instability is multidimensional, fraught with ambiguity, and may involve various convoluted identifiers.

Adler and Ziglio<sup>58</sup> stated that, in the absence of complete information, the health care provider has 2 options. First, they may wait until they have enough information to create an adequate theory. Second, they may make the most of the available information and use this knowledge for the best possible consequence. This investigation suggests that judicious use of the Delphi survey findings may contribute to a growing pool of data for identification of CCSI. Thus, by using the clusters of identifiers proposed within the Delphi survey consensus, practitioners may glean additional information for successful assessment of CCSI.

### *Limitations*

It has been proposed that the Delphi method builds on the Lockean notion of agreement, a notion that learning is a collective action process and is the basis of truth.<sup>80</sup> Although some authors<sup>47,51,80</sup> have stated that, if the shared members demonstrate expertise and consensus, an empirical generalization is judged to be objective, true, or factual, other authors<sup>45,81</sup> have countered that Delphi survey findings are relegated to experience, sharing, and wisdom of the panel members. Opponents to the Delphi method argue that findings should not be judged by the same validation criteria as hard science derived by scientific method<sup>45,81</sup> but rather that the findings should be considered to be a process for making best use of available information in the absence of a criterion standard and in the presence of ambiguity.

The Delphi method is a qualitative analysis and does not have the sampling requirements of a randomized design.<sup>58</sup> However, it is worth noting that fewer than 12% of the targeted population responded to initial recruitment. There may be several reasons for the low response rate. First, e-mail annual response rates for surveys dropped consistently from 1992 to 2000.<sup>82</sup> On average, response rates dropped nearly 10% per year during that time.<sup>83</sup> Second, it is estimated that the average e-mail user receives 39 unsolicited e-mails each day.<sup>82</sup> Bradley<sup>84</sup> stated that this phenomenon has

prompted many users to create several e-mail addresses, thus maintaining an address for “bulk,” unsolicited mail. Third, this study used the Microsoft Outlook mass e-mail function to distribute to participants. The Microsoft Outlook distribution reports when e-mail addresses are no longer in service but does not automatically report when an e-mail blocking program is limiting access to the targeted user or when e-mail users “churn” addresses, such as switching to a different provider but not closing an old account.<sup>84</sup> Therefore, chance exists that the introductory e-mails did not arrive at all of the potential 1,015 eligible OCS respondents who Microsoft Outlook did not recognize as having a bad e-mail address. Another potential limitation is that the findings may not be representative of the group of therapists we sampled because a large majority may not have been reached via e-mail.

A documented weakness of a Delphi method is the stand-alone principle.<sup>58</sup> The stand-alone principle allows the respondent to evaluate only one variable at a time. Within this study, respondents were asked if one single variable was associated with spine instability, a process that was repeated throughout the study. This process is analogous to asking if A (one identifier) = Z (spine instability), B (a different identifier) = Z, and C (a different identifier) = Z, and so on. In reality, some of the identifiers may be associated with spine instability only when combined with other identifiers (A + B + C may = Z). Subsequently, using a cluster of identifiers is likely a more pertinent application of this information for clinical practice. Expert clinicians may be able to integrate the proposed evidence provided and improve their clinical decision making.

### **Conclusion**

Clinical cervical spine instability is difficult to diagnose and may involve subtle clinical features. Our Delphi investigation was designed to identify common symptoms and physical examination findings for cervical spine instability used by expert physical therapists in daily practice. Most identifiers involved assessment methods that encompass intricate palpation and visual assessment skills, poor tolerance to certain postures, and movement-related similarities. Although selected identifiers within each of these categories met consensus, it does not suggest that these variables are individual predictors of CCSI. Diagnosis and prediction of CCSI are marred by the failure to determine a criterion standard for this pathology, and appropriate clinical reasoning is required for distinctive assessment.

Future studies should prospectively cluster the Delphi method identifiers using a cross-impact analysis. A cross-impact analysis minimizes this drawback of the Delphi process and can predict the probability of 2 or more

individual components detecting if a conclusive finding is present, allowing for better analytical depth in assessment. In addition, identification of the confidence of expert physical therapists in detecting CCSI may lead to further beneficial findings.

## References

- 1 Bronfort G, Evans R, Nelson B, et al. A randomized clinical trial of exercise and spinal manipulation for patients with chronic neck pain. *Spine*. 2001;26:788–799.
- 2 Jull G, Trott P, Potter H, et al. A randomized controlled trial of exercise and manipulative therapy for cervicogenic headache. *Spine*. 2002;27:1835–1843.
- 3 Petersen SM. Articular and muscular impairments in cervicogenic headache: a case report. *J Orthop Sports Phys Ther*. 2003;33:21–30.
- 4 Kristjansson E, Leivseth G, Brinckmann P, Frobin W. Increased sagittal plane segmental motion in the lower cervical spine in women with chronic whiplash-associated disorders, grades I-II: a case-control study using a new measurement protocol. *Spine*. 2003;28:2215–2221.
- 5 Maigne JY, Lapeyre E, Morvan G, Chatellier G. Pain immediately upon sitting down and relieved by standing up is often associated with radiologic lumbar instability or marked anterior loss of disc space. *Spine* 2003;28:1327–1334.
- 6 Dobbs A. Manual therapy assessment of cervical instability. *Orthopaedic Physical Therapy Clinics of North America*. 2001;10:431–454.
- 7 Pope MH, Frymoyer JW, Krag MH. Diagnosing instability. *Clin Orthop*. 1992;279:60–67.
- 8 Vo P, MacMillan M. The aging spine: clinical instability. *South Med J*. 1994;87:S26–S35.
- 9 Panjabi MM, Lydon C, Vasavada A, et al. On the understanding of clinical instability. *Spine*. 1994;19:2642–2650.
- 10 Oxland TR, Panjabi MM. The onset and progression of spinal injury: a demonstration of neutral zone sensitivity. *J Biomech*. 1992;25:1165–1172.
- 11 Aspinall W. Clinical testing for the craniovertebral hypermobility syndrome. *J Orthop Sports Phys Ther*. 1990;12:47–54.
- 12 Dai L. Disc degeneration and cervical instability: correlation of magnetic resonance imaging with radiography. *Spine*. 1998;23:1734–1738.
- 13 Panjabi MM. The stabilizing system of the spine, part I: function, dysfunction, adaptation, and enhancement. *J Spinal Disord*. 1992;5:383–389.
- 14 Panjabi MM. The stabilizing system of the spine, part II: neutral zone and instability hypothesis. *J Spinal Disord*. 1992;5:390–397.
- 15 Derrick L, Chesworth B. Post-motor vehicle accident alar ligament laxity. *J Orthop Sports Phys Ther*. 1992;16:6–11.
- 16 Niere K, Selvaratnam P. The cervical region. In: Zuluaga M, Briggs C, Carlisle J, et al, eds. *Sports Physiotherapy: Applied Science and Practice*. Melbourne, Victoria, Australia: Churchill Livingstone Inc; 1995:325–341.
- 17 White AA III, Southwick WO, Panjabi MM. Clinical instability of the cervical spine: a review of past and current concepts. *Spine*. 1976;1:15–27.
- 18 Sanchez Martin MM. Occipital-cervical instability. *Clin Orthop*. 1992;283:67–73.
- 19 Swinkels RA, Oostendorp RA. Upper cervical instability: fact or fiction? *J Manipulative Physiol Ther*. 1996;19:185–194.
- 20 Posner I, White AA III, Edwards WT, Hayes WC. A biomechanical analysis of the clinical stability of the lumbar and lumbosacral spine. *Spine*. 1982;7:374–389.
- 21 Farfan HF, Gracovetsky S. The nature of instability. *Spine*. 1984;9:714–719.
- 22 Dupuis PR, Yong-Hing K, Cassidy JD, Kirkaldy-Willis WH. Radiologic diagnosis of degenerative lumbar spinal instability. *Spine*. 1985;10:262–276.
- 23 Frymoyer JW, Selby DK. Segmental instability: rationale for treatment. *Spine*. 1985;10:280–286.
- 24 Friberg O. Lumbar instability: a dynamic approach by traction-compression radiography. *Spine*. 1987;12:119–129.
- 25 Niere KR, Torney SK. Clinicians' perceptions of minor cervical instability. *Man Ther*. 2004;9:144–150.
- 26 Olson KA, Joder D. Diagnosis and treatment of cervical spine clinical instability. *J Orthop Sports Phys Ther*. 2001;31:194–206.
- 27 Jull G, Barrett C, Magee R, Ho P. Further clinical clarification of the muscle dysfunction in cervical headache. *Cephalalgia*. 1999;19:179–185.
- 28 Lestini WF, Wiesel SW. The pathogenesis of cervical spondylosis. *Clin Orthop*. 1989;239:69–93.
- 29 Montazem A. Secondary tinnitus as a symptom of instability of the upper cervical spine: operative management. *Int Tinnitus J*. 2000;6:130–133.
- 30 O'Sullivan PB, Burnett A, Floyd AN, et al. Lumbar repositioning deficit in a specific low back pain population. *Spine*. 2003;28:1074–1079.
- 31 Klein GN, Mannion AF, Panjabi MM, Dvorak J. Trapped in the neutral zone: another symptom of whiplash-associated disorder? *Eur Spine J*. 2001;10:141–148.
- 32 Paley D, Gillespie R. Chronic repetitive unrecognized flexion injury of the cervical spine (high jumper's neck). *Am J Sports Med*. 1986;14:92–95.
- 33 Hayes MA, Howard TC, Gruel CR, Kopta JA. Roentgenographic evaluation of lumbar spine flexion-extension in asymptomatic individuals. *Spine*. 1989;14:327–331.
- 34 Takayanagi K, Takahashi K, Yamagata M, et al. Using cineradiography for continuous dynamic-motion analysis of the lumbar spine. *Spine*. 2001;26:1858–1865.
- 35 Iguchi T, Kanemura A, Kasahara K, et al. Age distribution of three radiologic factors for lumbar instability: probable aging process of the instability with disc degeneration. *Spine*. 2003;28:2628–2633.
- 36 Pope MH, Panjabi M. Biomechanical definitions of instability. *Spine*. 1985;10:255–256.
- 37 Frymoyer JW, ed. *The Adult Spine*. Philadelphia, Pa: Lippincott-Raven; 1997.
- 38 Who Is a Fellow of the American Academy of Orthopaedic Manual Physical Therapists (FAAOMPT)? Available at: <http://www.aaompt.org>. Accessed October 28, 2004.
- 39 Binkley J, Finch E, Hall J, et al. Diagnostic classification of patients with low back pain: report on a survey of physical therapy experts. *Phys Ther*. 1993;73:138–155.
- 40 Cleary K. Using the Delphi process to reach consensus. *Journal of Cardiopulmonary Physical Therapy*. 2001;1:20–23.
- 41 Dillman DA. *Mail and Internet Surveys: The Tailored Design Method*. 2nd ed. New York, NY: John Wiley & Sons Inc; 2000:363.

- 42 Lopopolo RB. Hospital restructuring and the changing nature of the physical therapist's role. *Phys Ther.* 1999;79:171–185.
- 43 Pesik N, Keim M, Sampson TR. Do US emergency medicine residency programs provide adequate training for bioterrorism? *Ann Emerg Med.* 1999;34:173–176.
- 44 Vaughan-Williams P, Taylor G, Whittle JG. A model framework comparing resources required for activities in the Community Dental Service validated using the Delphi technique. *Community Dent Health.* 1999;16:85–92.
- 45 Dawson S, Barker J. Hospice and palliative care: a Delphi survey of occupational therapists roles and training needs. *Australian Occupational Therapy Journal.* 1995;2:119–127.
- 46 Fink A, Kosecoff J, Chassin M, Brook RH. Consensus methods: characteristics and guidelines for use. *Am J Public Health.* 1984;74:979–983.
- 47 Powell C. The Delphi technique: myths and realities. *J Adv Nurs.* 2003;41:376–382.
- 48 Stheeman SE, van't Hof MA, Mileman PA, van der Stelt PF. Use of the Delphi technique to develop standards for quality assessment in diagnostic radiology. *Community Dent Health.* 1995;12:194–199.
- 49 Begg C, Metz C. Consensus diagnoses and “gold standards.” *Med Decis Making.* 1990;10:29–30.
- 50 Altman RD. Criteria for the classification of osteoarthritis of the knee and hip. *Scand J Rheumatol Suppl.* 1987;65:31–39.
- 51 Graham B, Regehr G, Wright JG. Delphi as a method to establish consensus for diagnostic criteria. *J Clin Epidemiol.* 2003;56:1150–1156.
- 52 Cutting KF, White R. Defined and refined: criteria for identifying wound infection revisited. *Br J Community Nurs.* 2004;9:S6–S15.
- 53 Dvorak J, Panjabi MM, Novotny JE, et al. Clinical validation of functional flexion-extension roentgenograms of the lumbar spine. *Spine.* 1991;16:943–950.
- 54 Nachemson AL. Instability of the spine: pathology, treatment, and clinical evaluation. *Neurosurg Clin North Am.* 1991;2:785–790.
- 55 Reid N. The Delphi technique: its contribution to the evaluation of profession practice. In: Ellis R, ed. *Professional Competence and Quality Assurance in the Caring Professions.* London, United Kingdom: Croom Helm; 1988:116.
- 56 Clayton M. Delphi: a technique to harness for critical decision-making tasks in education. *Educational Psychology.* 1997;17:373–386.
- 57 Murphy MK, Black NA, Lamping DL, et al. Consensus development methods, and their use in clinical guideline development. *Health Technol Assess.* 1998;2:i-iv, 1–88.
- 58 Adler M, Ziglio E. *Gazing Into the Oracle: The Delphi Method and Its Application to Social Policy and Public Health.* London, United Kingdom: Jessica Kingsley Publishers; 1996.
- 59 Overview of the Specialist Certification Program. American Physical Therapy Association Web site. Available at: <http://www.apta.org/Education/specialist/WhyCertify/OverviewSpecCert>. Accessed October 28, 2004.
- 60 Panjabi MM, Nibu K, Cholewicki J. Whiplash injuries and the potential for mechanical instability. *Eur Spine J.* 1998;7:484–492.
- 61 Zhu Q, Ouyang J, Lu W, et al. Traumatic instabilities of the cervical spine caused by high-speed axial compression in a human model: an in vitro biomechanical study. *Spine.* 1999;24:440–444.
- 62 Boden S, Frymoyer JW. Segmental instability: overview and classification. In: Frymoyer JW, ed. *The Adult Spine.* Philadelphia, Pa: Lippincott-Raven; 1997:1209–1210.
- 63 Uhlig Y, Weber BR, Grob D, Müntener M. Fiber composition and fiber transformations in neck muscles of patients with dysfunction of the cervical spine. *J Orthop Res.* 1995;13:240–249.
- 64 Margery M, Rebeck T, Coughlan B, Rivett D. *APA Pre-Manipulative Testing Protocol for the Cervical Spine: Researched and Renewed, Part 2: Revised Clinical Guidelines.* Melbourne, Victoria, Australia: Australian Physiotherapy Association; 2000.
- 65 Murtagh JE, Kenna C. *Back Pain and Spinal Manipulation.* 2nd ed. Boston, Mass: Butterworth-Heinemann; 1997:66–79.
- 66 Meadows JTS. *Orthopedic Differential Diagnosis in Physical Therapy: A Case Study Approach.* New York, NY: McGraw-Hill; 1999:63–66, 116–118.
- 67 Taylor JR, O'Sullivan P. Lumbar segmental instability: pathology, diagnosis, and conservative management. In: Twomey LT, Taylor JR, eds. *Physical Therapy of the Low Back.* 3rd ed. New York, NY: Churchill Livingstone Inc; 2000:201–247.
- 68 Jull GA. Deep cervical flexor muscle dysfunction in whiplash. *Journal of Musculoskeletal Pain.* 2000;8:143–154.
- 69 Schellhas KP, Smith MD, Gundry CR, Pollei SR. Cervical discogenic pain: prospective correlation of magnetic resonance imaging and discography in asymptomatic subjects and pain sufferers. *Spine.* 1996;21:300–312.
- 70 Nederhand MJ, IJzerman MJ, Hermens HJ, et al. Cervical muscle dysfunction in the chronic whiplash associated disorder grade II (WAD-II). *Spine.* 2000;25:1938–1943.
- 71 Nederhand MJ, Hermens HJ, IJzerman MJ, et al. Cervical muscle dysfunction in chronic whiplash-associated disorder grade 2: the relevance of the trauma. *Spine.* 2002;27:1056–1061.
- 72 Olson K, Paris S, Spohr C, Gorniak G. Radiographic assessment and reliability study of the craniovertebral side bending test. *Journal of Manual and Manipulative Therapy.* 1998;6:87–96.
- 73 Cattrysse E, Swinkels RA, Oostendorp RA, Duquet W. Upper cervical instability: are clinical tests reliable? *Man Ther.* 1997;2:91–97.
- 74 Uitvlugt G, Indenbaum S. Clinical assessment of atlantoaxial instability using the Sharp-Purser test. *Arthritis Rheum.* 1988;31:918–922.
- 75 Kaigle AM, Holm SH, Hansson TH. Experimental instability in the lumbar spine. *Spine.* 1995;15:20:421–430.
- 76 Paris SV. Physical signs of instability. *Spine.* 1985;10:277–279.
- 77 Gonnella C, Paris SV, Kutner M. Reliability in evaluating passive intervertebral motion. *Phys Ther.* 1982;62:436–444.
- 78 Jensen GM, Gwyer JF, Shepard KF, Hack LM. Expert practice in physical therapy. *Phys Ther.* 2000;80:28–43.
- 79 Jensen GM, Shepard KF, Hack LM. The novice versus the experienced clinician: insights into the work of the physical therapist. *Phys Ther.* 1990;70:314–323.
- 80 Mitroff I, Turoff M. Philosophical and methodological foundations of the Delphi. In: Linstone HA, Turoff M, eds. *The Delphi Method: Techniques and Applications.* Reading, Mass: Addison-Wesley Publishing; 1975.
- 81 Sackman H. *Delphi Critique.* Lexington, Mass: Lexington Books; 1975.
- 82 Bickart B, Schmittlein D. The distribution of survey contact and participation in America: constructing a survey-based estimate. *Journal of Marketing Research.* 1999;36:286–294.
- 83 Sheehan K. E-mail survey response rates: a review. *Journal of Computer Mediated Communication.* 2001;6:1–20.
- 84 Bradley N. Sampling for Internet surveys: an examination of respondent selection for Internet research. *Journal of the Market Research Society.* 1999;41:387–395.
